# Supplementary material for: Fibroblast growth factor (FGF), FGF receptor (FGFR), and cyclin D1 (CCND1) DNA methylation in head and neck squamous cell carcinomas is associated with transcriptional activity, gene amplification, human papillomavirus (HPV) status, and sensitivity to tyrosine kinase inhibitors
Source: PubMed Central journal article supplement (PMC8693503; doi:10.1186/s13148-021-01212-4), 2021-12-21

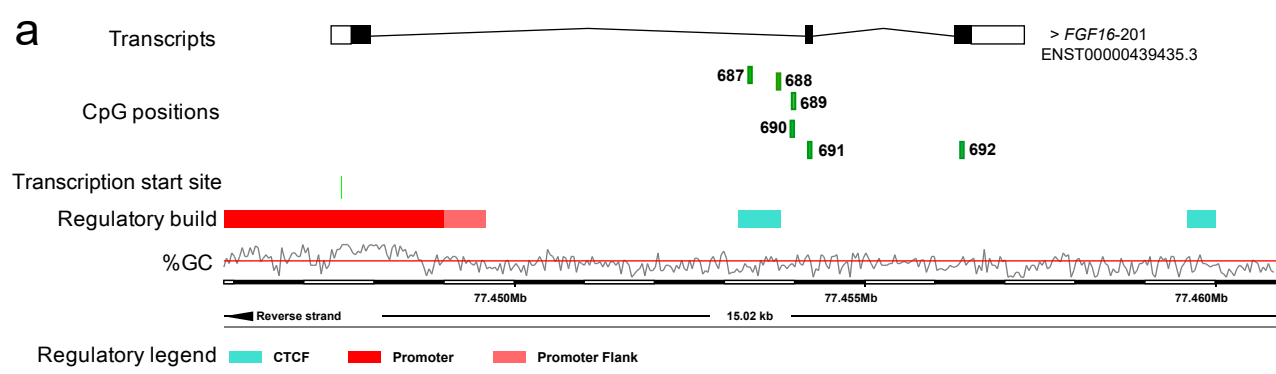

**b** *FGF16* methylation [%] and mRNA [n.c.] in normal tissues and tumors; \* $P < 0.05$ , \* $P_{\text{Corrected}} < 0.05$

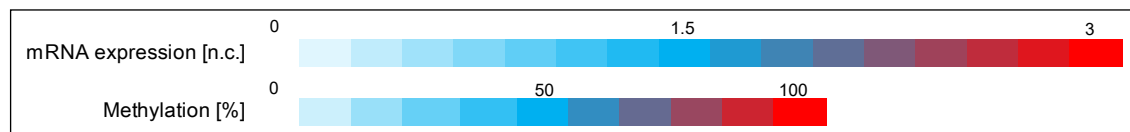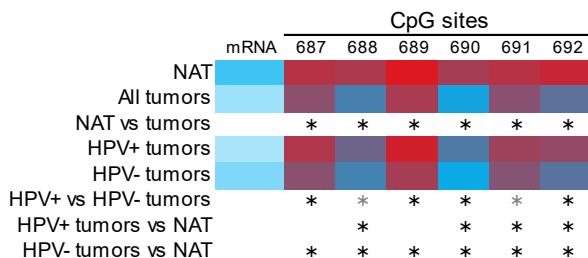

**c** Correlation (Spearman's  $\rho$ ) with mRNA expression; \* $P < 0.05$ , \* $P_{\text{Corrected}} < 0.05$

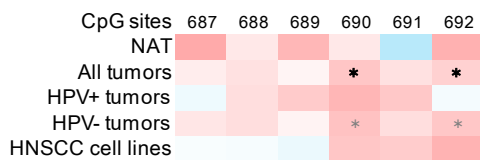

**d** Correlation (Spearman's  $\rho$ ) with *FGF16* copy number variation; \* $P < 0.05$ , \* $P_{\text{Corrected}} < 0.05$

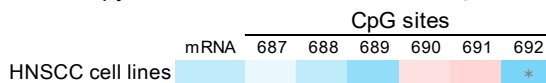

**e** Correlation (Spearman's  $\rho$ ) with response [ln(IC<sub>50</sub>)] to FGFR inhibitors in HNSCC cell lines; \* $P < 0.05$ , \* $P_{\text{Corrected}} < 0.05$

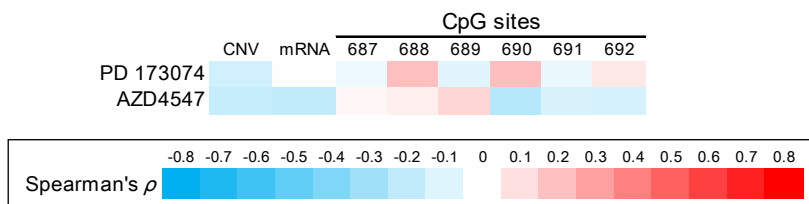

Supplement: 13148_2021_1212_MOESM16_ESM.pdf [file 13148_2021_1212_MOESM16_ESM.pdf]
